# Supplementary material
Source: PubMed Central journal article supplement (PMC8374741)
Supplement: jamacardiol-e213055-s001.pdf [file jamacardiol-e213055-s001.pdf]

## Supplementary Online Content

van Rosendaal AR, van den Hoogen IJ, Gianni U, et al. Association of statin treatment with progression of coronary atherosclerotic plaque composition. *JAMA Cardiol*. Published online August 18, 2021. doi:10.1001/jamacardio.2021.3055

**eFigure 1.** Flowchart

**eFigure 2.** Plaque Volumes by Compositional Type at Baseline and Follow-up CCTA

**eFigure 3.** Compositional Plaque Changes According to Baseline Plaque Volume in Patients Begun on Statin Treatment After Baseline CCTA

**eFigure 4.** Calcium Densification With Statin Therapy

**eTable 1.** Atherosclerotic Profile per Coronary Lesions at Baseline

**eTable 2.** Plaque Composition Proportions According the Presence of Low-Density, High-Density Calcium, or 1K Plaque

**eTable 3.** Interaction Baseline Plaque Volume and Statin With Compositional Plaque Change, Stratified by the Median CT Interval

**eTable 4.** Statin Use and Progression of Calcium Density Subgroups, Restricted to Lesions Without Necrotic Core or Fibro-Fatty Plaque

**eTable 5.** Plaque Progression According to Calcium and Calcium Density Subgroups

**eTable 6.** Baseline Characteristics of Patients Who Began on Statins After Baseline CCTA and Patients not on Statins

**eTable 7.** Baseline Plaque Volumes According to Newly Started Statin and No Statin Use

This supplementary material has been provided by the authors to give readers additional information about their work.

**eFigure 1. Flowchart**

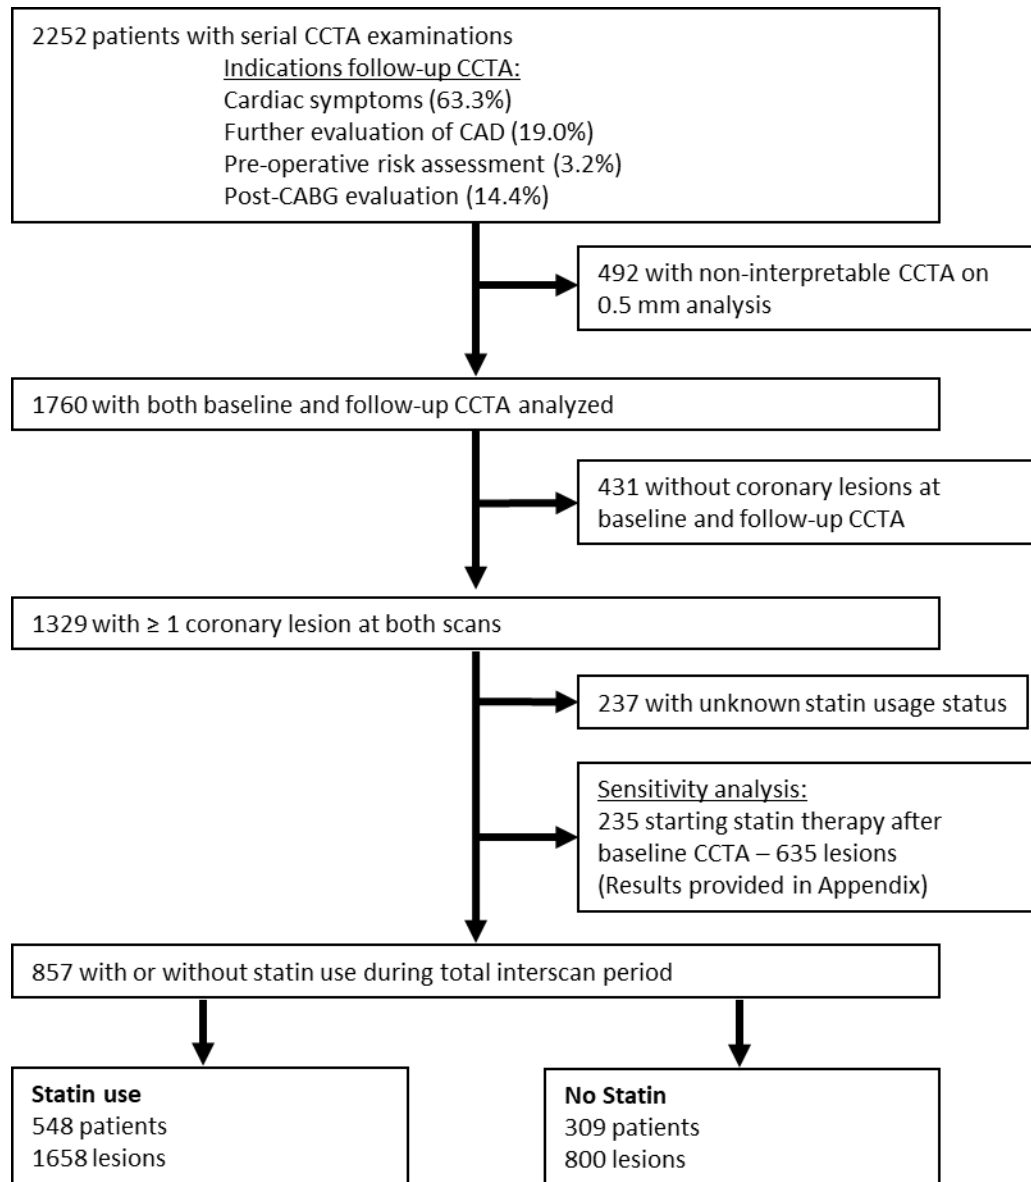

**eFigure 2. Plaque Volumes by Compositional Type at Baseline and Follow-up CCTA**

**A**

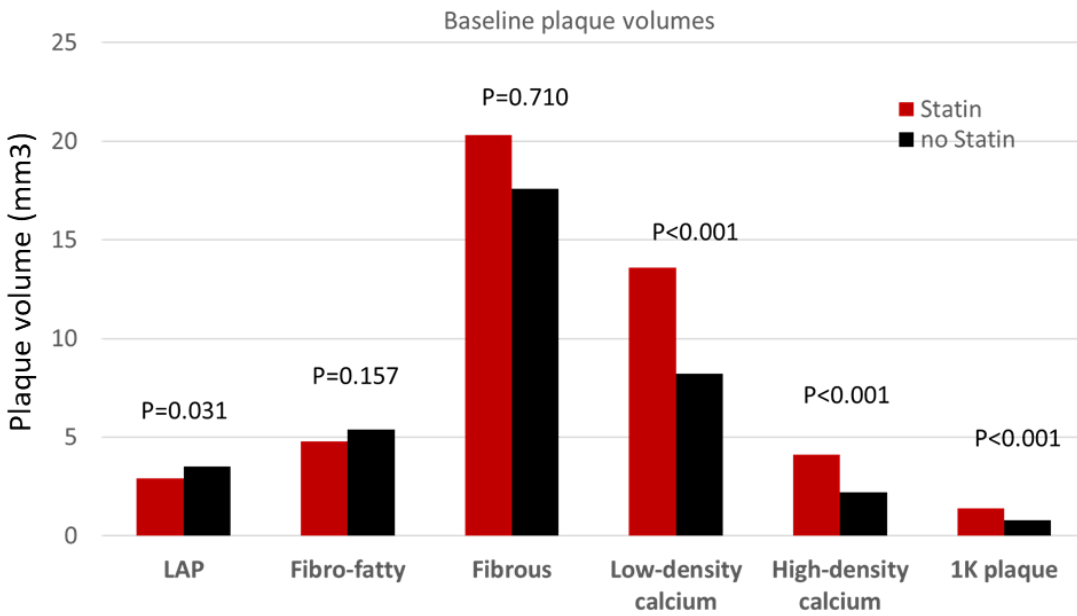

**B**

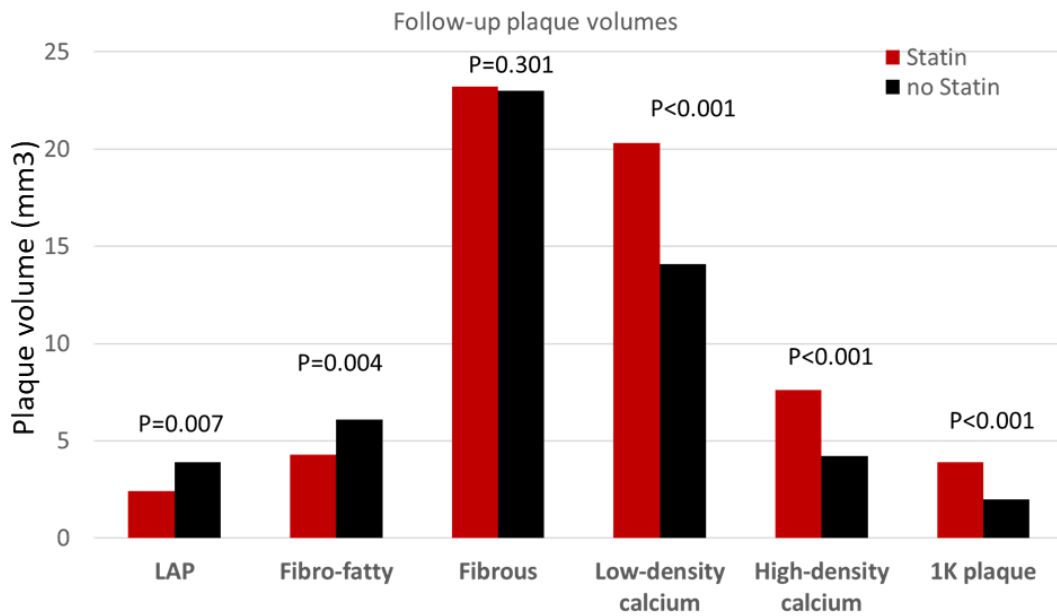

**eFigure 3. Compositional Plaque Changes According to Baseline Plaque Volume in Patients Begun on Statin Treatment After Baseline CCTA**

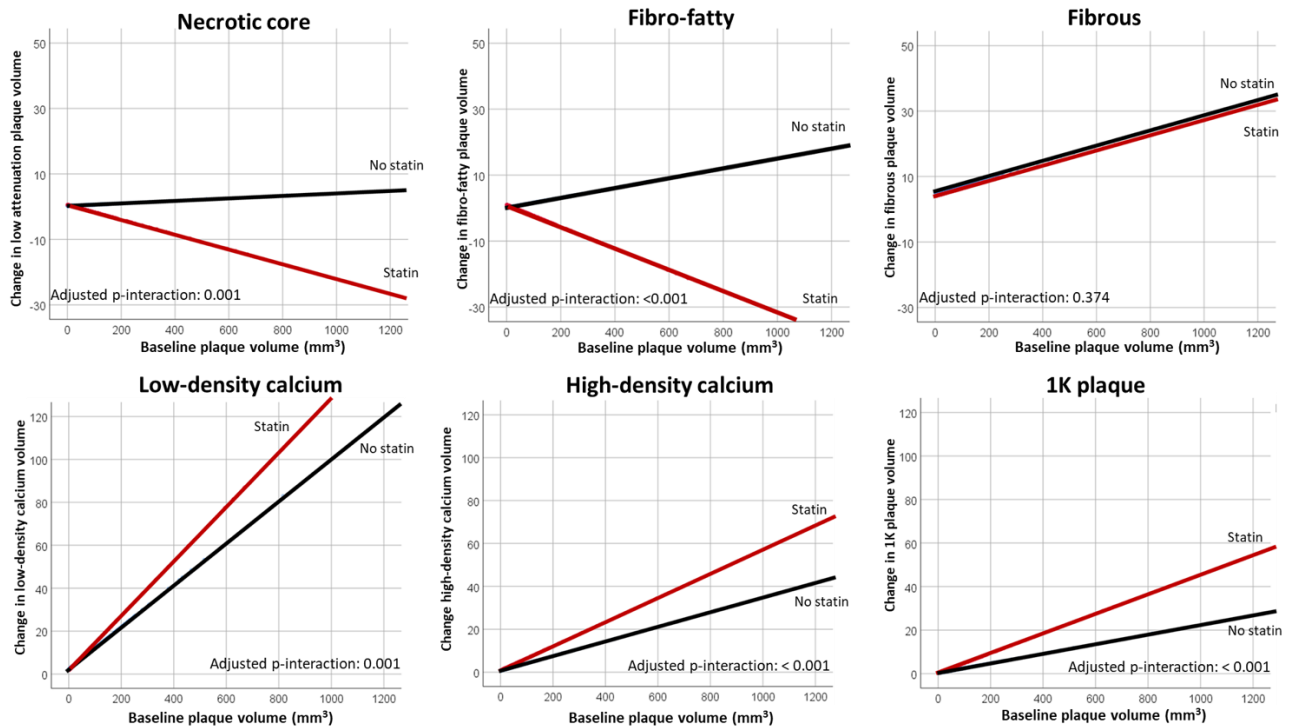

Comparison between lesions in patients started statins after baseline CCTA compared to those versus not treated with statins at both CCTAs. Predicted changes in LAP, fibro-fatty plaque, fibrous plaque, low-density and high-density calcium, and 1K plaque are presented according to baseline plaque volume and statin use. The predicted changes (bold lines) are derived from a generalized linear model including baseline plaque volume, statin use and the interaction term. The p-values for interaction are derived from a linear mixed model, and adjusted for age, sex, diabetes, hypertension, smoking status, BMI, and CT-interval. Without statins, increasing trends of all non-calcified and calcified density subgroups are observed, while with statins significant reductions in LAP and fibrofatty plaque and larger increases in low-density, high-density calcium and 1K plaque.

### eFigure 4. Calcium Densification With Statin Therapy

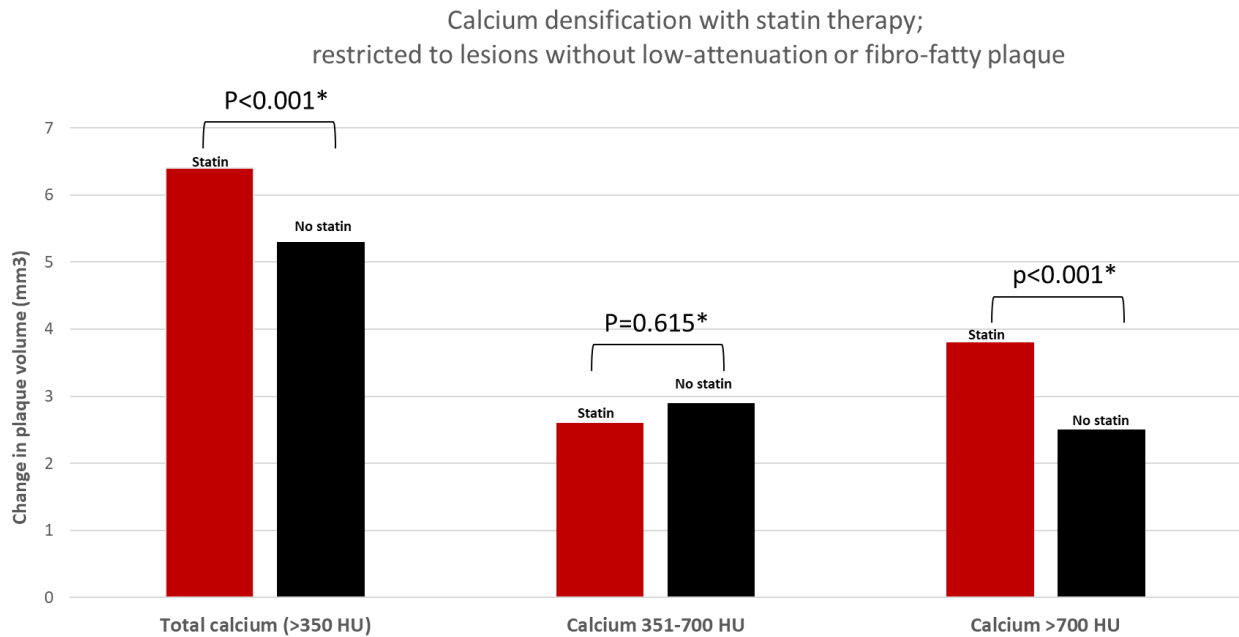

Comparison between lesions with newly started statins after baseline CCTA versus lesions not treated with statins at both CCTA's. Estimated changes in overall calcium, low-density calcium, and higher density calcium according to statin therapy. Estimated changes in plaque volume are shown for the mean baseline plaque volume, the mean of other continuous variables and the geometric mean of categorical variables.

\* P-values represent the interaction between plaque volume and statin use, adjusted for age, sex, diabetes, hypertension, smoking status, BMI, and CT-interval, derived from linear mixed models.

**eTable 1. Atherosclerotic Profile per Coronary Lesions at Baseline**

|                                       | <b>Statin<br/>N=1658</b> | <b>No statin<br/>N=800</b> | <b>p-value</b> | <b>Spotty<br/>calcification<br/>N=273</b> | <b>No spotty<br/>calcification<br/>N=2185</b> | <b>p-value</b> |
|---------------------------------------|--------------------------|----------------------------|----------------|-------------------------------------------|-----------------------------------------------|----------------|
| <b>Baseline</b>                       |                          |                            |                |                                           |                                               |                |
| Necrotic core, mm <sup>3</sup>        | 2.9 ± 8.7                | 3.5 ± 10.2                 | 0.031          | 6.3 ± 12.5                                | 2.7 ± 8.7                                     | <.001          |
| Fibro-fatty plaque, mm <sup>3</sup>   | 4.8 ± 10.5               | 5.4 ± 11.4                 | 0.157          | 10.4 ± 15.3                               | 4.3 ± 9.9                                     | <.001          |
| Fibrous plaque, mm <sup>3</sup>       | 20.3 ± 35.4              | 17.6 ± 30.2                | 0.710          | 37.8 ± 47.9                               | 17.1 ± 30.8                                   | <.001          |
| Low-density calcium, mm <sup>3</sup>  | 13.6 ± 29.8              | 8.2 ± 16.9                 | <.001          | 16.1 ± 28.5                               | 11.3 ± 26.1                                   | <.001          |
| High-density calcium, mm <sup>3</sup> | 4.1 ± 11.7               | 2.2 ± 6.7                  | <.001          | 3.5 ± 9.0                                 | 3.5 ± 10.5                                    | 0.162          |
| 1K plaque, mm <sup>3</sup>            | 1.4 ± 6.6                | 0.79 ± 4.1                 | <.001          | 0.91 ± 3.6                                | 1.3 ± 6.1                                     | 0.558          |
|                                       |                          |                            |                |                                           |                                               |                |

**eTable 2. Plaque Composition Proportions According the Presence of Low-Density, High-Density Calcium, or 1K Plaque**

|                                                  | Lesions with low-density calcium only<br>N=990 | Lesions with low- and high-density calcium<br>N=608 | Lesions with low-, high-density calcium, and 1K plaque<br>N=572 | p-value |
|--------------------------------------------------|------------------------------------------------|-----------------------------------------------------|-----------------------------------------------------------------|---------|
| <b>Composition<sup>†</sup></b>                   |                                                |                                                     |                                                                 |         |
| Necrotic core, %                                 | 3.6 ± 7.6                                      | 2.4 ± 5.7                                           | 2.0 ± 4.3                                                       | 0.033   |
| Fibro-fatty plaque, %                            | 8.6 ± 10.3                                     | 5.3 ± 7.8                                           | 4.4 ± 6.3                                                       | <0.001  |
| Fibrous plaque, %                                | 62.2 ± 18.7                                    | 41.9 ± 18.3                                         | 31.9 ± 16.3                                                     | <0.001  |
| low-density calcium, %                           | 25.8 ± 22.5                                    | 44.8 ± 21.1                                         | 38.8 ± 13.5                                                     | <0.001  |
| High-density calcium, %                          | 0                                              | 5.8 ± 7.3                                           | 17.2 ± 10.1                                                     | <0.001  |
| 1K plaque, %                                     | 0                                              | 0                                                   | 5.7 ± 6.8                                                       | <0.001  |
| †calculated as percentage of total plaque volume |                                                |                                                     |                                                                 |         |

**eTable 3. Interaction Baseline Plaque Volume and Statin With Compositional Plaque Change, Stratified by the Median CT Interval**

|                                               | <u>Delta necrotic core</u>          |         | <u>Delta fibro-fatty plaque</u>     |         | <u>Delta fibrous plaque</u>         |         |
|-----------------------------------------------|-------------------------------------|---------|-------------------------------------|---------|-------------------------------------|---------|
|                                               | Adjusted beta-coefficient (95% CI)* | P-value | Adjusted beta-coefficient (95% CI)* | P-value | Adjusted beta-coefficient (95% CI)* | P-value |
| <b>Plaque volume at baseline * statin use</b> |                                     |         |                                     |         |                                     |         |
| <b>CT-interval &lt; median</b>                | 0.005 (-0.006, 0.016)               | 0.353   | -0.001 (-0.016, 0.013)              | 0.858   | -0.070 (-0.099, -0.041)             | <0.001  |
| <b>CT-interval &gt; median</b>                | -0.038 (-0.055, -0.020)             | <0.001  | -0.059 (-0.080, -0.038)             | <0.001  | 0.044 (0.006, 0.082)                | 0.023   |
|                                               |                                     |         |                                     |         |                                     |         |
|                                               | <u>Delta low-density calcium</u>    |         | <u>Delta high-density calcium</u>   |         | <u>Delta 1K plaque volume</u>       |         |
| <b>Plaque volume at baseline * statin use</b> |                                     |         |                                     |         |                                     |         |
| <b>CT-interval &lt; median</b>                | -0.024 (-0.045, -0.004)             | 0.020   | 0.001 (-0.009, 0.011)               | 0.899   | 0.003 (-0.008, 0.013)               | 0.614   |
| <b>CT-interval &gt; median</b>                | -0.005 (-0.031, 0.022)              | 0.740   | 0.030 (0.018, 0.043)                | <0.001  | 0.034 (0.020, 0.047)                | <0.001  |

Generalized linear mixed models with random intercept

\*adjusted for age, sex, diabetes, hypertension, body mass index, smoking status, CT-interval, and the two main effects of the interaction term

CT intervals are defined by the median: 3.2 years



**eTable 4. Statin Use and Progression of Calcium Density Subgroups, Restricted to Lesions Without Necrotic Core or Fibro-Fatty Plaque**

|                                                                                                                                                                                                                                                                                                                                                                                                                                                   | Delta total calcium >350 HU         |         | Delta calcium 350-700 HU            |         | Delta calcium ≥700                  |         |
|---------------------------------------------------------------------------------------------------------------------------------------------------------------------------------------------------------------------------------------------------------------------------------------------------------------------------------------------------------------------------------------------------------------------------------------------------|-------------------------------------|---------|-------------------------------------|---------|-------------------------------------|---------|
|                                                                                                                                                                                                                                                                                                                                                                                                                                                   | Adjusted beta-coefficient (95% CI)* | P-value | Adjusted beta-coefficient (95% CI)* | P-value | Adjusted beta-coefficient (95% CI)* | P-value |
| Variable                                                                                                                                                                                                                                                                                                                                                                                                                                          |                                     |         |                                     |         |                                     |         |
| Plaque volume at baseline * statin use                                                                                                                                                                                                                                                                                                                                                                                                            | -0.031 (-0.082, 0.021)              | 0.241   | -0.077 (-0.120, -0.034)             | <0.001  | 0.057 (0.023, 0.091)                | 0.001   |
| <p>Analyses in lesions without necrotic core or fibro-fatty plaque. Positive interaction terms between baseline plaque volume and statin use can be interpreted that statins are associated with larger increase of the specific plaque composition, and vice versa</p> <p>Generalized linear mixed models with random intercept</p> <p>*adjusted for age, sex, diabetes, hypertension, smoking status, BMI, CT-interval and the main effects</p> |                                     |         |                                     |         |                                     |         |

**eTable 5. Plaque Progression According to Calcium and Calcium Density Subgroups**

|                                                                                                                                                                                                                                                                                                                                                                                                                                                                                                                                            | <u>Statin use</u>                          |                | <u>No statin</u>                           |       |
|--------------------------------------------------------------------------------------------------------------------------------------------------------------------------------------------------------------------------------------------------------------------------------------------------------------------------------------------------------------------------------------------------------------------------------------------------------------------------------------------------------------------------------------------|--------------------------------------------|----------------|--------------------------------------------|-------|
|                                                                                                                                                                                                                                                                                                                                                                                                                                                                                                                                            | <u>Delta total plaque volume (N=1658)</u>  |                | <u>delta total plaque volume (N=800)</u>   |       |
| <b>Plaque volume at baseline *</b>                                                                                                                                                                                                                                                                                                                                                                                                                                                                                                         | <b>Adjusted beta-coefficient (95% CI)*</b> | <b>P-value</b> | <b>Adjusted beta-coefficient (95% CI)*</b> |       |
| <b>All lesions</b>                                                                                                                                                                                                                                                                                                                                                                                                                                                                                                                         |                                            |                |                                            |       |
| Percentage calcium                                                                                                                                                                                                                                                                                                                                                                                                                                                                                                                         | -0.003 (-0.004, -0.002)                    | <.001          | -0.003 (-0.005, -0.002)                    | <.001 |
|                                                                                                                                                                                                                                                                                                                                                                                                                                                                                                                                            |                                            |                |                                            |       |
| <b>Lesions with calcium†</b>                                                                                                                                                                                                                                                                                                                                                                                                                                                                                                               |                                            |                |                                            |       |
| Percentage low-density calcium                                                                                                                                                                                                                                                                                                                                                                                                                                                                                                             | 0.003 (0.002, 0.005)                       | <.001          | 0.003 (0.000, 0.006)                       | 0.020 |
| Percentage high-density calcium                                                                                                                                                                                                                                                                                                                                                                                                                                                                                                            | -0.005 (-0.007, -0.003)                    | <.001          | -0.004 (-0.008, 0.001)                     | 0.088 |
| Percentage 1K plaque                                                                                                                                                                                                                                                                                                                                                                                                                                                                                                                       | -0.007 (-0.009, -0.005)                    | <.001          | -0.008 (-0.013, -0.002)                    | 0.013 |
|                                                                                                                                                                                                                                                                                                                                                                                                                                                                                                                                            |                                            |                |                                            |       |
| <b>Lesions with high-density calcium or 1K plaque†</b>                                                                                                                                                                                                                                                                                                                                                                                                                                                                                     |                                            |                |                                            |       |
| Percentage 1K plaque                                                                                                                                                                                                                                                                                                                                                                                                                                                                                                                       | -0.006 (-0.009, 0.003)                     | <.001          | -0.007 (-0.015, 0.001)                     | 0.073 |
|                                                                                                                                                                                                                                                                                                                                                                                                                                                                                                                                            |                                            |                |                                            |       |
| <p>Generalized linear mixed models with random intercept. Positive interaction terms between baseline plaque volume and the percentage of calcium density can be interpreted that a higher percentage of plaque being low-density, high-density, or 1K plaque is associated with larger increase in total plaque volume, and vice versa</p> <p>*adjusted for age, sex, diabetes, hypertension, CT-interval, and the main effects of the interaction term</p> <p>† calculated as calcium density subgroup / total calcium volume * 100%</p> |                                            |                |                                            |       |

**eTable 6. Baseline Characteristics of Patients Who Began on Statins After Baseline CCTA and Patients not on Statins**

|                                    | <b>Newly started statin<br/>N=235</b> | <b>No statin<br/>N=309</b> | <b>p-value</b> |
|------------------------------------|---------------------------------------|----------------------------|----------------|
| <b>Demographics</b>                |                                       |                            |                |
| Age, years                         | 60.9 ± 8.5                            | 61.1 ± 8.7                 | 0.859          |
| Male, n                            | 150 (63.8)                            | 181 (58.6)                 | 0.178          |
| Body mass index, kg/m <sup>2</sup> | 24.7 ± 3.3                            | 25.7 ± 3.3                 | 0.003          |
| CT-interval, years                 |                                       |                            | <0.001         |
| 2-4                                | 135 (57.4)                            | 223 (72.2)                 |                |
| 4-6                                | 63 (26.8)                             | 62 (20.1)                  |                |
| >6                                 | 37 (15.7)                             | 24 (7.8)                   |                |
| Location                           |                                       |                            | 0.121          |
| Korea                              | 167 (71.1)                            | 245 (79.2)                 |                |
| Canada                             | 17 (7.2)                              | 10 (3.2)                   |                |
| Europe                             | 42 (17.9)                             | 45 (14.6)                  |                |
| Brazil                             | 9 (3.8)                               | 9 (2.9)                    |                |
| <b>Risk factors</b>                |                                       |                            |                |
| Diabetes, n                        | 61 (26.0)                             | 62 (20.1)                  | 0.073          |
| Hypertension, n                    | 136 (57.9)                            | 156 (50.5)                 | 0.054          |
| Family history for CAD, n          | 77 (32.8)                             | 67 (21.7)                  | 0.004          |
| Currently smoking, n               | 43 (18.3)                             | 54 (17.5)                  | 0.694          |
| <b>Medication use at baseline</b>  |                                       |                            |                |
| Aspirin, n                         | 88 (37.4)                             | 101 (32.7)                 | 0.270          |
| ACE inhibitor or ARB, n            | 59 (25.1)                             | 79 (25.7)                  | 0.870          |
| Beta blocker, n                    | 58 (24.7)                             | 63 (20.5)                  | 0.211          |
| <b>Lipid profile at baseline</b>   |                                       |                            |                |
| Total cholesterol, mg/dl           | 197 ± 37                              | 186 ± 35                   | 0.001          |
| LDL cholesterol, mg/dl             | 122 ± 30                              | 113 ± 29                   | 0.001          |
| HDL cholesterol, mg/dl             | 50 ± 15                               | 50 ± 13                    | 0.501          |
| <b>Lipid profile at follow-up</b>  |                                       |                            |                |
| Total cholesterol, mg/dl           | 162 ± 37                              | 181 ± 34                   | <.001          |
| LDL cholesterol, mg/dl             | 94 ± 34                               | 110 ± 30                   | <.001          |
| HDL cholesterol, mg/dl             | 50 ± 14                               | 49 ± 12                    | 0.555          |

Data are shown as mean ± SD, or counts (percentage).

CT, computed tomography; ACE, angiotensin converting enzyme; ARB, angiotensin II receptor blocker; LDL, low-density lipoprotein; HDL, high-density lipoprotein

**eTable 7. Baseline Plaque Volumes According to Newly Started Statin and No Statin Use**

|                                                                                 | <b>Statin started after<br/>baseline CT<br/>N=635</b> | <b>No statin at both CT<br/>scans<br/>N=800</b> | <b>p-value</b> |
|---------------------------------------------------------------------------------|-------------------------------------------------------|-------------------------------------------------|----------------|
| <b><u>Baseline</u></b>                                                          |                                                       |                                                 |                |
| Necrotic core, mm <sup>3</sup>                                                  | 4.1 ± 12.7                                            | 3.5 ± 10.2                                      | 0.450          |
| Fibro-fatty plaque, mm <sup>3</sup>                                             | 5.9 ± 12.8                                            | 5.4 ± 11.4                                      | 0.517          |
| Fibrous plaque, mm <sup>3</sup>                                                 | 20.2 ± 32.9                                           | 17.6 ± 30.2                                     | 0.286          |
| Low-density calcium, mm <sup>3</sup>                                            | 10.5 ± 22.2                                           | 8.2 ± 16.9                                      | 0.011          |
| High-density calcium, mm <sup>3</sup>                                           | 3.0 ± 9.8                                             | 2.2 ± 6.7                                       | 0.001          |
| 1K plaque, mm <sup>3</sup>                                                      | 1.2 ± 6.8                                             | 0.79 ± 4.1                                      | 0.098          |
| Data are shown as mean ± SD, or counts (percentage).<br>CT: computed tomography |                                                       |                                                 |                |
